# Supplementary material
Source: PubMed Central journal article supplement (PMC6513371)
Supplement: rcsann.2019.0022-A2.pdf [file rcsann.2019.0022-A2.pdf]

**Supplementary table 1** Tests ordered either at nurse-led clinic (2015 and 2016) or on receipt of the referral in the straight-to-test pathway (2016 only). Figure in brackets represents the percentage of patients receiving the stated test. There was a significant difference in the proportion of patients receiving a colonoscopy, oesophagogastroduodenoscopy (OGD), computed tomography (CT) colonography or magnetic resonance imaging (MRI) between 2015 and 2016, chi-squared test.

|                        | <b>2015 Cohort</b> | <b>2016 Cohort</b> | <b>P-value</b> |
|------------------------|--------------------|--------------------|----------------|
| Total referrals        | 664                | 954                |                |
| Colonoscopy            | 475 (71.5%)        | 795 (83.3%)        | < 0.00001      |
| CT                     | 213 (32.0%)        | 316 (33.1%)        | n.s.           |
| OGD                    | 115 (17.3%)        | 132 (13.8%)        | < 0.05         |
| CT colonography        | 104 (15.7%)        | 54 (5.7%)          | < 0.00001      |
| Flexible sigmoidoscopy | 20 (3.0%)          | 29 (3.0%)          | n.s.           |
| MRI                    | 20 (3.0%)          | 8 (0.8%)           | < 0.001        |
| Other tests            | 14 (2.1%)          | 12 (1.3%)          | n.s.           |
| Total tests            | 961                | 1346               |                |
