# Supplementary material
Source: PubMed Central journal article supplement (PMC6513371)
Supplement: rcsann.2019.0022-A3.pdf [file rcsann.2019.0022-A3.pdf]

**Supplementary table 2** The referral criterion fulfilled in the 2016 and 2015 pathways. Cancers in the far left column include colorectal and non-colorectal sites. Non-colorectal cancer diagnoses are separated out in the far right column.

| A. Referral criteria fulfilled summary, 2016 cohort.                                                                                                                                                  |                     |                      |         |                      |                                     |
|-------------------------------------------------------------------------------------------------------------------------------------------------------------------------------------------------------|---------------------|----------------------|---------|----------------------|-------------------------------------|
| Referral criterion fulfilled                                                                                                                                                                          | Cancer excluded (n) | Cancer diagnosed (n) | PPV (%) | Cancer diagnosed (n) | Non-colorectal cancer diagnosed (n) |
| Aged 60 years and over with iron-deficiency anaemia <sup>a</sup>                                                                                                                                      | 103                 | 20                   | 16.3    | 8                    | 8                                   |
| Aged 60 years and over with an unexplained anal mass                                                                                                                                                  | 15                  | 1                    | 6.3     | 0                    | 0                                   |
| Tests show an occult bleed in the faeces                                                                                                                                                              | 13                  | 1                    | 7.1     | 0                    | 0                                   |
| Lower abdominal mass consistent with involvement of the large bowel                                                                                                                                   | 38                  | 9                    | 19.1    | 6                    | 6                                   |
| Palpable rectal mass                                                                                                                                                                                  | 45                  | 5                    | 10.0    | 2                    | 2                                   |
| Aged under 50 years with rectal bleeding and any unexplained symptoms or findings <sup>b</sup>                                                                                                        | 52                  | 5                    | 8.8     | 2                    | 2                                   |
| Aged 40 years and over with unexplained rectal bleeding and changes in bowel habit <sup>c</sup>                                                                                                       | 133                 | 6                    | 5.6     | 0                    | 0                                   |
| Aged 50 years and over with unexplained rectal bleeding                                                                                                                                               | 191                 | 7                    | 3.5     | 1                    | 1                                   |
| Aged 60 years and over with changes in bowel habit <sup>c</sup>                                                                                                                                       | 449                 | 21                   | 4.5     | 11                   | 11                                  |
| Aged 40 years and over with unexplained weight loss and abdominal pain                                                                                                                                | 56                  | 5                    | 8.2     | 4                    | 4                                   |
| <sup>a</sup> Men with unexplained iron deficiency anaemia and haemoglobin of 110 g/l or below OR non-menstruating women with unexplained iron deficiency anaemia and haemoglobin of 100 g/l or below. |                     |                      |         |                      |                                     |
| <sup>b</sup> Abdominal pain; change in bowel habit; <sup>b</sup> weight loss; iron-deficiency anaemia <sup>a</sup>                                                                                    |                     |                      |         |                      |                                     |
| <sup>c</sup> Change in bowel habit is defined as 'change to loose stools and/or increased frequency of defecation'. PPV, positive predictive value.                                                   |                     |                      |         |                      |                                     |
| B. Referral criteria fulfilled summary, 2015 cohort.                                                                                                                                                  |                     |                      |         |                      |                                     |
| Referral criterion fulfilled                                                                                                                                                                          | Cancer excluded (n) | Cancer diagnosed (n) | PPV (%) | Cancer diagnosed (n) | Non-colorectal cancer diagnosed (n) |
| Unexplained iron deficient anaemia <sup>a</sup>                                                                                                                                                       | 90                  | 24                   | 21.0    | 3                    | 3                                   |
| 40 years and older with rectal bleeding and change in bowel habit <sup>a</sup> persisting for 6 weeks or more                                                                                         | 115                 | 17                   | 12.9    | 2                    | 2                                   |
| Palpable rectal mass                                                                                                                                                                                  | 40                  | 9                    | 18.4    | 4                    | 4                                   |
| 60 years and older with rectal bleeding persisting 6 weeks of more without change in bowel habit <sup>b</sup> or anal symptoms                                                                        | 82                  | 5                    | 5.7     | 1                    | 1                                   |
| 60 years and older with change in bowel habit <sup>b</sup> for 6 weeks or more                                                                                                                        | 289                 | 16                   | 5.2     | 3                    | 3                                   |
| Lower abdominal mass consistent with involvement of the large bowel                                                                                                                                   | 44                  | 2                    | 4.3     | 0                    | 0                                   |
| <sup>a</sup> Men with unexplained iron deficiency anaemia and haemoglobin of 110 g/l or below OR non-menstruating women with unexplained iron deficiency anaemia and haemoglobin of 100 g/l or below. |                     |                      |         |                      |                                     |
| <sup>b</sup> Change in bowel habit is defined as 'change to loose stools and/or increased frequency of defecation'. PPV, positive predictive value.                                                   |                     |                      |         |                      |                                     |
